# Supplementary material
Source: publisher figshare collection journal article supplement (https://tandf.figshare.com/ndownloader/files/18512237)
Supplement: Supplementary file 1 [file 18512237]

## Sheet: SUPPLEMENTALtabletrimme.005dres
Supplemental Table 1: Odds ratios (ORs) and standard errors (SEs) for associations of drug use at 1 and 3 year lag
	One year lag					Three year lag
	% exposed					% exposed
Generic Drug Name	cases	controls	OR	SE	p-value	cases	controls	OR	SE	p-value
ACAMPROSATE CALCIUM								0.54	1.04	0.551
ACARBOSE	0.11	0.16	0.84	0.3	0.57544			0.85	0.42	0.61
ACEBUTOLOL	0.12	0.12	0.9	0.29	0.724436			0.82	0.37	0.602
ACETAMINOPHEN			0.73	0.59	0.60256			1.41	0.6	0.576
ACETAMINOPHEN WITH CODEINE	3.02	2.99	0.94	0.06	0.288403	1.8629	1.9963	0.87	0.09	0.124
ACETAZOLAMIDE	0.34	0.25	1.25	0.18	0.20893	0.2154	0.1561	1.28	0.26	0.342
ACETIC ACID			1.81	0.49	0.229087
ACETIC ACID/HYDROCORTISONE	0.17	0.12	1.3	0.26	0.301995			1.42	0.34	0.307
ACETYLCYSTEINE			1.63	0.45	0.275423
ACITRETIN			1.45	0.54	0.489779			0.52	1.03	0.525
ACITRETIN/EMOLLIENT COMB NO.2								1.75	0.79	0.477
ACYCLOVIR	1.4	1.23	0.94	0.09	0.467735	0.8617	0.8148	0.87	0.13	0.265
ADALIMUMAB	0.11	0.08	0.97	0.32	0.933254			1.14	0.41	0.744
ALBUTEROL	7.55	7.56	0.95	0.04	0.177828	4.3467	5.0727	0.79	0.06	9.08e-05
ALCLOMETASONE DIPROPIONATE	0.11	0.09	0.94	0.32	0.851138			1.29	0.39	0.511
ALENDRONATE	9	7.94	1.03	0.04	0.371535	6.9446	6.2492	0.99	0.05	0.761
ALENDRONATE /VITAMIN D3						0.7477	0.8567	0.77	0.14	0.0523
ALISKIREN HEMIFUMARATE	0.23	0.37	0.58	0.21	0.01	0.1521	0.2119	0.66	0.3	0.163
ALISKIREN/HYDROCHLOROTHIAZIDE								0.58	0.73	0.353
ALISKIREN/VALSARTAN			0.53	0.6	0.288403			0	75.64	0.903
ALLOPURINOL	3.67	4.2	0.85	0.06	0.0042658	2.6739	3.0104	0.85	0.07	0.0326
ALMOTRIPTAN MALATE								1.92	0.66	0.325
ALPRAZOLAM	1.41	1.27	1	0.09	0.977237	0.5956	0.6638	0.83	0.15	0.156
ALPROSTADIL			1.41	0.42	0.416869			1.34	0.55	0.593
AMANTADINE	0.32	0.2	1.32	0.19	0.144544			0.83	0.33	0.51
AMCINONIDE			0.49	0.73	0.331131
AMILORIDE			0.63	0.6	0.436516			0.74	0.74	0.679
AMILORIDE/HYDROCHLOROTHIAZIDE								1.17	0.34	0.651
AMIODARONE	1.66	1.77	0.81	0.08	0.00812831	1.0518	1.1524	0.76	0.12	0.0214
AMITRIP /CHLORDIAZEPOXIDE
AMITRIPTYLINE	3.32	2.67	1.12	0.06	0.0524807	2.4205	2.0522	1.55	0.08	0.498
AMLODIPINE /OLMESARTAN MED								0.72	0.35	0.343
AMLODIPINE	14.39	16.29	0.86	0.03	7.41e-07	10.0874	11.3867	0.85	0.04	5.62e-05
AMLODIPINE /BENAZEP	2.73	3.52	0.79	0.06	0.000223872	2.4078	3.0218	0.8	0.08	0.00305
AMLODIPINE/ATORVAST CAL	0.56	0.72	0.8	0.14	0.0977237	0.4562	0.599	0.75	0.17	0.0938
AMLODIPINE/VALSARTAN/HCTHIAZI								0.69	1.04	0.718
AMMONIUM LACTATE	0.61	0.7	0.83	0.13	0.169824	0.3168	0.4175	0.77	0.21	0.0988
AMOX TR/POTASSIUM CLAVULANATE						2.6739	2.3644	0.93	0.08	0.322
AMOXICILLIN	11.05	10.58	0.87	0.03	2.51189e-05	7.4642	7.0018	0.86	0.05	0.00163
AMOXICILLIN/POTASSIUM CLAV	0.88	0.78	0.94	0.11	0.57544			1.44	0.42	0.381
AMPHET ASP/AMPHET/D-AMPHET	0.13	0.07	1.48	0.29	0.186209			1.49	0.42	0.34
AMPICILLIN TRIHYDRATE	0.27	0.24	1	0.2	1	0.1901	0.1561	1.97	0.28	0.739
AMYLASE/LIPASE/PROTEASE	0.19	0.29	0.58	0.23	0.018197	0.1394	0.2551	0.47	0.31	0.0143
ANAGRELIDE			0.78	0.61	0.676083
ANASTROZOLE	0.56	0.67	0.69	0.14	0.00691831
APREPITANT			0.83	0.4	0.645654
ARIPIPRAZOLE	0.6	0.47	1.08	0.14	0.60256	0.3422	0.2729	1.85	0.21	0.695
ASPIRIN			0.48	0.36	0.0436516			0.55	0.51	0.237
ASPIRIN/DIPYRIDAMOLE	0.99	0.71	1.25	0.11	0.0380189	0.6463	0.5038	1.15	0.15	0.349
ATAZANAVIR SULFATE								0.91	1.05	0.931
ATENOLOL	9.73	10.1	0.94	0.04	0.0831764	8.1739	8.4143	0.93	0.04	0.11
ATENOLOL/CHLORTHALIDONE	0.74	0.67	1.17	0.12	0.186209	0.7097	0.5622	1.35	0.14	0.0647
ATORVASTATIN CALCIUM	17.81	17.79	0.94	0.03	0.040738	14.6243	14.5239	0.92	0.03	0.0137
ATOVAQUONE/PROGUANIL			1	0.38	1			0.95	0.54	0.927
ATROPINE SULFATE			0.97	0.38	0.933254			1.17	0.53	0.771
AZATHIOPRINE	0.33	0.16	1.56	0.19	0.0190546	0.2661	0.1079	1.88	0.25	0.0111
AZELAIC ACID	0.16	0.1	1.2	0.26	0.501187			1.49	0.38	0.902
AZELASTINE	1.38	1.18	0.95	0.09	0.524807	0.8364	0.7767	0.85	0.13	0.228
AZITHROMYCIN	14.31	13.85	0.85	0.03	3.47e-07	8.1612	8.2557	0.79	0.05	3.69e-07
BACITRACIN	0.13	0.15	0.77	0.28	0.338844			1.12	0.38	0.773
BACITRACIN/POLYMYXIN B SULFAT								0.48	1.03	0.48
BACLOFEN	1.98	0.63	2.73	0.08	3.24e-34	1.0265	0.3947	2.21	0.13	5.57e-10
BALSALAZIDE DI			1.14	0.36	0.707946			1.16	0.48	0.753
BECAPLERMIN			0	74.46	0.891251			0	89.51	0.919
BECLOMETHASONE DIPROPIONATE	0.54	0.45	1.13	0.14	0.380189	0.2661	0.3059	0.89	0.23	0.356
BENAZEPRIL	1.92	2.36	0.82	0.07	0.00776247	1.4067	1.7768	0.77	0.1	0.00993
BENAZEPRIL/HYDROCHLOROTHIAZID						0.4182	0.4442	0.94	0.18	0.742
BENZONATATE	0.11	0.09	1.13	0.32	0.707946			0.73	0.6	0.596
BENZOYL PEROXIDE								0	77.48	0.905
BENZTROPINE MESYLATE	0.23	0.33	0.58	0.21	0.0104713			0.43	0.34	0.0138
BETAMET DIPROP/CALCIPOTRIENE								0.8	0.53	0.665
BETAMET DIPROP/PROP GLY	0.49	0.47	0.92	0.15	0.60256	0.3168	0.3046	0.94	0.21	0.774
BETAMETHASONE DIPROPIONATE	0.58	0.58	0.91	0.14	0.501187	0.3548	0.3439	0.91	0.2	0.651
BETAMETHASONE VALERATE	0.49	0.42	0.98	0.15	0.870964	0.3802	0.2957	1.78	0.2	0.701
BETAXOLOL	0.19	0.15	1.18	0.24	0.489779	0.2154	0.1472	1.29	0.26	0.337
BETHANECHOL CHLORIDE	0.23	0.16	1.23	0.22	0.338844			1.51	0.34	0.883
BICALUTAMIDE	0.19	0.26	0.66	0.23	0.0776247	0.1521	0.1612	0.85	0.3	0.602
BIMATOPROST	1.41	1.61	0.83	0.09	0.0371535	0.9758	1.1498	0.79	0.12	0.0544
BISAC/NACL/NAHCO3/KCL/PEG 335								0.45	0.42	0.0616
BISOPROLOL FUMARATE	0.45	0.36	1.1	0.16	0.524807	0.4055	0.2399	1.45	0.19	0.0557
BISOPROLOL FUMARATE/HCTZ	0.76	0.79	0.94	0.12	0.616595	0.6463	0.6371	0.97	0.15	0.831
BOSENTAN								1.93	0.79	0.407
BRIMONIDINE TARTRATE	1.58	1.7	0.91	0.08	0.263027	1.1405	1.2031	0.91	0.11	0.416
BRIMONIDINE TARTRATE/TIMOLOL						0.2281	0.2323	0.89	0.25	0.633
BRINZOLAMIDE	0.54	0.49	1.05	0.14	0.74131	0.3041	0.3325	0.88	0.22	0.544
BROMFENAC	0.72	0.62	1.02	0.12	0.912011	0.3548	0.3274	0.93	0.2	0.701
BROMOCRIPTINE MESYLATE			1.96	0.43	0.112202
BROMPHENIRAMINE								0.74	1.05	0.779
BUDESONIDE	1.12	0.69	1.34	0.1	0.00371535	0.8111	0.5495	1.16	0.14	0.265
BUDESONIDE/FORMOTEROL FUMARAT						0.3548	0.3503	0.91	0.2	0.653
BUMETANIDE	0.64	0.74	0.85	0.13	0.199526	0.3802	0.467	0.76	0.19	0.154
BUPRENORPHINE /NALOXONE HC								0.66	1.05	0.695
BUPROPION HBR	2.45	1.89	1.1	0.07	0.17378	1.5968	1.2818	1.23	0.1	0.81
BUSPIRONE	1.01	0.81	1.09	0.1	0.398107	0.7477	0.4937	1.32	0.14	0.0509
BUTALB/ACETAMINOPHEN/CAFFEINE								1.91	0.38	0.0856
BUTALBITAL/ASPIRIN/CAFFEINE								1.76	0.65	0.389
BUTENAFINE			2.1	0.38	0.0501187
CALCIPOTRIENE	0.17	0.19	0.81	0.25	0.398107	0.1647	0.146	0.98	0.29	0.933
CALCITONIN,SALMON,SYNTHETIC	0.94	0.7	1.11	0.11	0.338844	0.7097	0.5445	1.82	0.14	0.586
CALCITRIOL	0.42	0.55	0.8	0.16	0.17378	0.2788	0.3084	0.96	0.23	0.86
CALCIUM ACETATE	0.14	0.26	0.7	0.27	0.190546			0.25	0.72	0.0552
CANDESARTAN CILEXETIL	0.54	0.65	0.78	0.14	0.0812831	0.5576	0.5736	0.92	0.16	0.598
CANDESARTAN/HYDROCHLOROTHIAZI						0.2028	0.2132	0.98	0.26	0.715
CAPTOPRIL	0.44	0.64	0.78	0.15	0.0977237	0.4309	0.5445	0.86	0.18	0.41
CAPTOPRIL/HYDROCHLOROTHIAZIDE								1.4	0.61	0.949
CARBAMAZEPINE	0.43	0.5	0.73	0.16	0.0446684	0.3422	0.3693	0.78	0.2	0.209
CARBIDOPA			1.67	0.5	0.30903			0.52	1.04	0.525
CARBIDOPA/LEVODOPA	2.74	1.34	1.73	0.07	3.09e-16	1.394	0.8935	1.3	0.1	0.0126
CARBIDOPA/LEVODOPA/ENTACAPONE								0.85	0.43	0.615
CARBINOXAMINE			2.29	0.4	0.0398107			1.27	0.75	0.749
CARISOPRODOL	0.95	0.89	0.89	0.11	0.275423	0.621	0.6308	0.82	0.15	0.192
CARTEOLOL			0.95	0.53	0.912011
CARVEDILOL	4.37	5.67	0.74	0.05	3.16e-09	2.9401	3.6373	0.77	0.07	0.000177
CEFACLOR	0.11	0.14	0.67	0.31	0.20893			0.82	0.4	0.626
CEFADROXIL HYDRATE	0.45	0.38	1.01	0.16	0.954993	0.3295	0.2602	1.99	0.21	0.655
CEFAZOLIN			1.68	0.5	0.295121			2.52	0.66	0.164
CEFDINIR	0.85	0.73	0.93	0.11	0.512861	0.3675	0.3795	0.77	0.2	0.188
CEFEPIME			1.77	0.45	0.20893			0	88.72	0.916
CEFPODOXIME PROXETIL			0.62	0.43	0.263027			0.72	0.61	0.595
CEFPROZIL			0.38	0.39	0.0123027			0.27	0.72	0.0711
CEFTRIAXONE NA/DEXTROSE,ISO	0.25	0.2	1.09	0.21	0.676083			1.17	0.34	0.64
CEFUROXIME AXETIL	1.25	1.07	0.95	0.09	0.549541	0.697	0.5698	0.95	0.15	0.713
CELECOXIB	4.72	4.14	0.99	0.05	0.758578	3.4343	3.1804	0.92	0.07	0.222
CEPHALEXIN	7.95	7.78	0.83	0.04	2.63e-06	4.8536	4.8151	0.81	0.06	0.000195
CETIRIZINE	1.47	1.47	0.89	0.09	0.154882	1.3686	1.3212	0.89	0.1	0.273
CEVIMELINE			0.4	0.59	0.123027
CHLOR-MAL/PHENYLEPH/METHSCOP								0	90.03	0.916
CHLORAMBUCIL								0.67	1.05	0.705
CHLORDIAZEPOXIDE			0.62	0.73	0.512861			0	86.22	0.915
CHLORHEXIDINE GLUCONATE	1.4	1.28	0.9	0.09	0.213796	0.8617	0.7996	0.86	0.13	0.251
CHLOROTHIAZIDE
CHLORPHENIRAMINE								0.75	1.05	0.783
CHLORPROMAZINE			0.85	0.4	0.691831			0.71	0.6	0.577
CHLORPROPAMIDE								0	82.66	0.913
CHLORTHALIDONE	0.56	0.5	1.12	0.14	0.416869	0.2788	0.2868	0.98	0.23	0.916
CHLORZOXAZONE	0.19	0.14	1.19	0.24	0.467735	0.1394	0.1155	1	0.32	0.991
CHOL SAL/MAGNESIUM SALICYLATE								0.28	1.02	0.215
CHOLESTYRAMINE (WITH SUGAR)	0.63	0.5	1.06	0.13	0.660693	0.3802	0.3224	0.97	0.2	0.86
CICLESONIDE			0.72	0.47	0.489779			0.64	1.04	0.628
CICLOPIROX	0.54	0.47	0.97	0.14	0.831764	0.4309	0.2919	1.22	0.19	0.282
CICLOPIROX OLAMINE	0.43	0.42	0.93	0.16	0.645654	0.3675	0.2729	1.17	0.2	0.438
CILOSTAZOL	0.67	0.85	0.79	0.13	0.0588844	0.4309	0.5838	0.72	0.18	0.0664
CIMETIDINE	0.33	0.29	1.07	0.18	0.724436	0.2535	0.2462	0.99	0.24	0.973
CINACALCET			0.44	0.46	0.0724436			0	66.56	0.883
CIPROFLOXACIN	12.68	11.97	0.89	0.03	0.000457088	7.743	7.1351	0.91	0.05	0.0236
CIPROFLOXACIN /HC	0.11	0.12	0.76	0.31	0.371535			0.48	0.46	0.118
CITALOPRAM HYDROBROMIDE	5.09	4.04	1.12	0.05	0.0158489	2.826	2.339	1.4	0.07	0.588
CITRIC ACID/POTASSIUM CITRATE								0.98	0.75	0.977
CLARITHROMYCIN	0.97	1.05	0.75	0.11	0.0057544	0.7223	0.6853	0.84	0.14	0.203
CLEMASTINE FUMARATE								0.64	1.04	0.665
CLINDAMYCIN	2.84	2.42	0.95	0.06	0.389045	1.9389	1.5471	0.97	0.09	0.764
CLINDAMYCIN PALMITATE	0.33	0.27	0.97	0.18	0.851138	0.2535	0.1701	1.21	0.24	0.43
CLOBETASOL PROPIONATE	2.25	2.13	0.88	0.07	0.0776247	1.508	1.325	0.94	0.1	0.548
CLOCORTOLONE PIVALATE			1.05	0.62	0.933254			0.51	1.04	0.52
CLOMIPRAMINE			1.38	0.49	0.512861
CLONAZEPAM	0.61	0.56	0.94	0.13	0.630957	0.3295	0.2538	1.9	0.21	0.684
CLONIDINE	2.33	2.92	0.82	0.07	0.00338844	1.5461	2.0814	0.76	0.1	0.00344
CLOPIDOGREL	9.93	10.22	0.91	0.04	0.00776247	6.8179	7.5831	0.81	0.05	2.77e-05
CLORAZEPATE DIPOTASSIUM			1.08	0.47	0.870964			0.82	0.74	0.789
CLOTRIMAZOLE	0.72	0.7	0.96	0.12	0.707946	0.4816	0.434	1.57	0.17	0.751
CLOTRIMAZOLE/BETAMET DIPROP	2.55	2.59	0.9	0.07	0.102329	1.6981	1.5801	0.97	0.09	0.756
CLOZAPINE			0.8	0.47	0.645654
CODEINE SULF			1.63	0.42	0.251189
CODEINE/BUTALBIT/ACETAMIN/CAF								0.76	1.06	0.795
CODEINE/PROMETHAZINE			0.58	0.42	0.199526			0.36	0.72	0.151
COLCHICINE	1.33	1.56	0.85	0.09	0.0691831	0.8491	1.0686	0.8	0.13	0.0766
COLCHICINE/PROBENECID			1.03	0.4	0.954993
COLESEVELAM	0.78	0.57	1.19	0.12	0.151356	0.5196	0.3858	1.12	0.17	0.503
COLESTIPOL	0.2	0.17	1.02	0.23	0.933254			0.72	0.4	0.398
COLLAGENASE	0.19	0.17	0.97	0.24	0.891251			0.81	0.47	0.654
CROMOLYN	0.11	0.12	0.97	0.31	0.912011			1.13	0.38	0.743
CYANOCOBALAMIN	0.14	0.1	1.57	0.28	0.104713			1.26	0.44	0.601
CYCLOBENZAPRINE	4.6	4.07	1	0.05	0.977237	3.0541	2.6588	1.13	0.07	0.852
CYCLOPHOSPHAMIDE			0.75	0.74	0.707946			0.96	1.06	0.968
CYCLOSPORINE	1.45	1.19	1.01	0.09	0.933254	0.9631	0.8046	0.98	0.12	0.856
CYPROHEPTADINE	0.23	0.27	0.87	0.21	0.501187			0.69	0.33	0.254
D-METHORPHAN HB/PROMETH								3.3	0.66	0.0699
DABIGATRAN ETEXILATE MESYLATE								0.94	0.53	0.912
DAPSONE			0.7	0.47	0.446684			0.99	0.54	0.979
DARIFENACIN HYDROBROMIDE	0.9	0.77	0.97	0.11	0.794328	0.5196	0.5229	0.83	0.17	0.246
DESIPRAMINE			0.83	0.38	0.616595
DESLORATADINE	0.51	0.43	1.06	0.15	0.707946	0.3295	0.3668	0.79	0.21	0.264
DESMOPRESSIN (NONREFRIGERATED								1.54	0.45	0.338
DESONIDE	0.91	0.7	1.03	0.11	0.776247	0.5576	0.4023	1.87	0.16	0.609
DESOXIMETASONE	0.55	0.55	0.82	0.14	0.165959	0.3929	0.3452	0.93	0.19	0.683
DESVENLAFAXINE	0.19	0.13	1.12	0.24	0.645654			1.46	0.41	0.913
DEXAMETHASONE	0.55	0.62	0.72	0.14	0.0204174	0.3422	0.3871	0.74	0.2	0.144
DEXLANSOPRAZOLE	0.34	0.34	0.83	0.18	0.295121			0.5	0.46	0.133
DEXTROAMPHETAMINE SULFATE			1.36	0.39	0.42658			1.48	0.56	0.484
DIAZEPAM	0.35	0.35	0.82	0.17	0.263027			0.6	0.33	0.12
DICLOFENAC EPOLAMINE	3.89	3.69	0.94	0.05	0.281838	2.3825	2.3454	0.9	0.08	0.172
DICLOFENAC /MISOPROSTOL	0.3	0.42	0.6	0.19	0.00616595			0.36	0.32	0.000243
DICLOXACILLIN	0.11	0.1	0.93	0.31	0.812831			1.17	0.41	0.704
DICYCLOMINE	1.43	1.17	1.03	0.09	0.776247	1.0011	0.8389	1.3	0.12	0.98
DIFLORASONE DIACETATE			0.72	0.33	0.323594			0.56	0.46	0.216
DIFLUNISAL			1.15	0.36	0.707946			0.98	0.53	0.855
DIFLUPREDNATE	0.16	0.19	0.76	0.26	0.281838
DIGOXIN	3.24	3.89	0.73	0.06	4.47e-08	2.3825	2.9875	0.69	0.08	1.47e-06
DILTIAZEM	4.95	5.13	0.89	0.05	0.0199526	3.7638	4.0663	0.86	0.06	0.0152
DIPHENHYDRAMINE	0.2	0.21	0.97	0.23	0.891251			0.74	0.35	0.379
DIPHENOXYLATE /ATROP SULF						1.0645	0.8529	1.5	0.12	0.964
DIPYRIDAMOLE	0.21	0.29	0.75	0.22	0.199526	0.1394	0.2246	0.64	0.31	0.16
DISOPYRAMIDE PHOSPHATE			0.64	0.6	0.457088
DIVALPROEX	1	0.86	0.92	0.11	0.457088	0.6463	0.5571	0.91	0.15	0.537
DOCUSATE CALCIUM			0.6	0.72	0.47863
DOFETILIDE			0.67	0.33	0.234423			0.4	0.6	0.123
DONEPEZIL	3.82	3.58	0.98	0.06	0.776247	1.9516	2.1931	0.82	0.09	0.0107
DORZOLAMIDE	0.24	0.35	0.65	0.21	0.040738	0.2028	0.2361	0.82	0.26	0.45
DORZOLAMIDE /TIMOLOL MALEA						0.2915	0.4277	0.61	0.22	0.0194
DOXAZOSIN MESYLATE	2.96	2.82	1.03	0.06	0.691831	2.3444	2.221	1.9	0.08	0.914
DOXEPIN	0.66	0.52	1.1	0.13	0.457088	0.4816	0.3922	1.82	0.17	0.649
DOXERCALCIFEROL			0.75	0.52	0.588844			0.86	0.74	0.836
DOXYCYCLINE CALCIUM	4.2	3.93	0.88	0.05	0.0165959	2.4078	2.3162	0.84	0.08	0.0246
DRONEDARONE	0.14	0.17	0.66	0.27	0.125893			0.83	0.48	0.7
DULOXETINE	2.62	1.91	1.12	0.07	0.0831764	1.4574	1.2171	0.96	0.1	0.692
DUTASTERIDE
ECONAZOLE NITRATE	0.86	0.69	1.09	0.11	0.446684	0.3802	0.4379	0.75	0.19	0.129
ENALAPRIL	3.52	4.01	0.91	0.06	0.0977237	2.7246	3.3188	0.83	0.07	0.0121
ENALAPRIL/HYDROCHLOROTHIAZIDE						0.2788	0.2399	1.12	0.23	0.613
ENOXAPARIN	1.22	0.81	1.2	0.1	0.0660693	0.6843	0.4658	1.15	0.15	0.355
ENTACAPONE	0.19	0.09	1.68	0.25	0.0389045			1.36	0.39	0.427
EPINASTINE	0.22	0.21	1	0.22	1	0.1774	0.1599	1.58	0.28	0.844
EPINEPHRINE	0.36	0.25	1.11	0.18	0.562341	0.2408	0.1421	1.26	0.25	0.357
EPLERENONE			0.58	0.42	0.204174
EPOETIN ALFA			0.65	0.33	0.186209			0.43	0.59	0.149
EPROSARTAN MESYLATE			1.72	0.45	0.229087
ERGOCALCIFEROL			0.92	0.37	0.812831			0.89	0.47	0.801
ERGOCALCIFEROL (VITAMIN D2)	0.13	0.15	0.99	0.28	0.977237			0.66	0.73	0.575
ERGOLOID MESYLATES			1.53	0.76	0.57544			0	89.93	0.919
ERGOTAMINE TARTRATE/CAFFEINE								0.51	1.04	0.522
ERYTHROMYCIN BASE	1.4	1.23	0.98	0.09	0.776247	0.8364	0.7627	0.94	0.13	0.628
ESCITALOPRAM OXALATE	4.69	3.61	1.11	0.05	0.0380189	2.9147	2.6474	0.91	0.07	0.206
ESOMEPRAZOLE MAG TRIHYDRATE	7.72	7.18	0.94	0.04	0.11749	5.4492	5.5372	0.85	0.05	0.0022
ESTRADIOL/LEVONORGESTREL			0.43	1.03	0.40738			0.59	1.05	0.613
ESTRADIOL/NORETH AC			0.67	0.37	0.288403			0.83	0.43	0.656
ESTROGEN,CON/M-PROGEST ACET	0.34	0.35	0.85	0.18	0.363078	0.2661	0.2792	0.78	0.23	0.274
ESTROGENS, CONJUGATED	4.16	3.05	1.16	0.05	0.00562341
ESTROPIPATE	0.17	0.15	0.98	0.25	0.933254	0.1774	0.1345	1.15	0.29	0.628
ESZOPICLONE	1.07	0.88	0.98	0.1	0.851138	0.735	0.6219	0.94	0.14	0.632
ETANERCEPT			0.59	0.33	0.104713			0.71	0.43	0.429
ETHAMBUTOL			0.21	1.01	0.123027
ETODOLAC	1.06	0.96	1.01	0.1	0.933254	0.7604	0.7234	0.93	0.14	0.615
EXENATIDE	0.31	0.44	0.72	0.19	0.0758578	0.2788	0.3173	0.88	0.23	0.582
EZETIMIBE	5.2	4.75	0.98	0.05	0.691831	4.4988	3.9165	1.4	0.06	0.95
EZETIMIBE/SIMVASTATIN	4.3	4.74	0.83	0.05	0.000354813	3.7004	4.2161	0.79	0.06	0.000235
FAMCICLOVIR	0.15	0.17	0.69	0.26	0.154882			0.46	0.42	0.0628
FAMOTIDINE	1.76	1.94	0.87	0.08	0.0691831	0.9631	1.2146	0.76	0.12	0.0258
FE BG/VIT C/B12/STOMC/CA-THR								0.98	0.52	0.965
FEBUXOSTAT	0.11	0.1	1.01	0.32	0.977237
FELODIPINE	0.99	1.12	0.92	0.1	0.42658	0.7984	0.9582	0.84	0.13	0.192
FENOFIBRATE	3.3	3.79	0.83	0.06	0.00147911	2.4332	2.7972	0.81	0.08	0.00698
FENOPROFEN CALCIUM								0.75	1.05	0.788
FENTANYL	1.17	0.93	1	0.1	0.977237	0.6083	0.5559	0.98	0.15	0.531
FESOTERODINE FUMARATE	0.11	0.09	1.03	0.31	0.933254			0.47	1.03	0.459
FEXOFENADINE	3.61	3.67	0.85	0.06	0.00467735	2.8387	2.9393	0.83	0.07	0.00801
FLAVOXATE			0.7	0.53	0.489779
FLECAINIDE ACETATE	0.43	0.33	1.01	0.16	0.954993	0.2788	0.2259	0.93	0.23	0.764
FLUCONAZOLE	2.48	2.2	0.92	0.07	0.218776	1.4067	1.3148	0.86	0.1	0.131
FLUNISOLIDE	0.17	0.24	0.68	0.25	0.114815	0.1394	0.1739	0.75	0.32	0.372
FLUOCINOLONE ACETONIDE	2.19	1.99	0.95	0.07	0.489779	1.508	1.2691	1.1	0.1	0.919
FLUOROMETHOLONE	0.4	0.37	0.98	0.16	0.912011	0.3802	0.2107	1.58	0.2	0.0236
FLUOROURACIL	0.66	0.53	0.92	0.13	0.524807	0.4309	0.3262	0.95	0.18	0.795
FLUOXETINE	3.17	2.35	1.22	0.06	0.000794328	2.3444	1.7324	1.21	0.08	0.0173
FLUPHENAZINE DECANOATE			0.27	1.01	0.194984			0	101.2	0.92
FLUPHENAZINE			0	77.34	0.891251			0	102.5	0.919
FLURANDRENOLIDE			0.38	0.59	0.107152			0.64	0.6	0.467
FLURBIPROFEN			0.79	0.35	0.489779			0.15	1.01	0.0603
FLUTAMIDE			0.76	0.74	0.707946			0.76	1.05	0.794
FLUTICASONE FUROATE	8.21	7.25	1	0.04	0.891251	5.0184	4.4572	0.96	0.06	0.46
FLUTICASONE/SALMETEROL	5.08	4.94	0.97	0.05	0.537032	3.3456	3.551	0.86	0.07	0.0266
FLUVASTATIN	0.66	0.64	0.97	0.13	0.776247	0.5829	0.6435	0.83	0.16	0.222
FLUVOXAMINE			1.05	0.4	0.912011			1.31	0.49	0.587
FOLIC ACID	0.6	0.53	1.02	0.13	0.912011	0.4562	0.4163	0.95	0.18	0.789
FONDAPARINUX			1.3	0.45	0.562341			1.57	0.77	0.562
FORMOTEROL FUMARATE	0.31	0.23	1.15	0.19	0.467735	0.2408	0.1916	1.57	0.25	0.822
FOSINOPRIL	0.66	0.77	0.93	0.13	0.57544	0.6083	0.6473	0.99	0.15	0.964
FOSINOPRIL/HYDROCHLOROTHIAZID								0.79	0.52	0.65
FUROSEMIDE	11.41	13.68	0.76	0.03	1.95e-15	7.7683	9.6188	0.75	0.05	4.99e-10
GABAPENTIN	8.79	6.98	1.16	0.04	0.000151356	5.0817	4.4077	1.33	0.06	0.556
GALANTAMINE HBR	0.37	0.29	1.13	0.17	0.47863	0.2281	0.1815	1.79	0.25	0.765
GATIFLOXACIN	1.91	1.69	0.99	0.08	0.851138	1.4827	1.1574	1.95	0.1	0.363
GEMFIBROZIL	1.88	1.97	0.98	0.08	0.831764	1.47	1.5686	0.95	0.1	0.61
GEMIFLOXACIN MESYLATE			1.07	0.54	0.891251			1	0.61	1
GENTAMICIN IN NACL, ISO-OSM	0.65	0.46	1.21	0.13	0.147911	0.3548	0.2513	1.2	0.2	0.374
GLIMEPIRIDE	2.19	3.08	0.78	0.07	0.000660693	1.5714	2.2019	0.78	0.1	0.00814
GLIPIZIDE	3.51	5.12	0.8	0.06	0.000120226	2.7753	4.0701	0.8	0.07	0.00216
GLIPIZIDE/METFORMIN			0.36	0.51	0.0467735			0.69	0.52	0.477
GLUCAGON,HUMAN RECOMBINANT	4.1	6.09	0.73	0.06	6.61e-09	2.9274	4.3747	0.75	0.07	6.33e-05
GLYBURIDE	2.12	2.97	0.83	0.07	0.00851138	1.7868	2.4228	0.86	0.09	0.106
GLYBURIDE, MICRO/METFORMIN	0.84	1.44	0.71	0.11	0.00239883	0.7097	1.2476	0.69	0.14	0.00867
GLYCOPYRROLATE	0.14	0.06	2.02	0.29	0.0162181			0.47	0.73	0.303
GRISEOFULVIN ULTRAMICROSIZE			0.78	0.43	0.549541			0.6	0.6	0.39
GUAIFENESIN								1.17	1.05	0.882
GUAIFENESIN/CODEINE PHOS	0.11	0.07	1.56	0.31	0.158489			1.71	0.39	0.172
GUAIFENESIN/DYPHYLLINE			1.16	0.62	0.812831			1.91	0.64	0.314
GUAIFENESIN/HYDROCODONE BIT								0.52	1.03	0.522
GUAIFENESIN/P-EPHED	0.11	0.12	0.81	0.3	0.47863	0.1394	0.0977	1.17	0.33	0.634
GUAIFENESIN/PHENYLEPHRINE								0.58	0.47	0.234
GUANFACINE			1.05	0.33	0.891251			1.19	0.47	0.968
HALOBETASOL PROP/AMMONIUM LAC						0.1647	0.1574	0.88	0.29	0.667
HALOPERIDOL	0.24	0.35	0.6	0.21	0.0158489	0.1394	0.1904	0.67	0.31	0.207
HC ACETATE/LIDOCAINE			1.33	0.36	0.42658			1.15	0.48	0.776
HC ACETATE/PRAMOXINE			1.05	0.36	0.912011			1.35	0.39	0.443
HEPARIN ,PORCINE	0.15	0.06	2.17	0.28	0.00630957			1.2	0.49	0.709
HYDRALAZINE	1.03	1.32	0.85	0.1	0.123027	0.7223	0.6929	1.13	0.14	0.386
HYDROCHLOROTHIAZIDE	13.39	14.22	0.94	0.03	0.0524807	10.4549	11.1519	0.92	0.04	0.0266
HYDROCODONE BIT/ACETAMINOPHEN						13.9779	13.3513	0.87	0.04	0.000136
HYDROCODONE/CHLORPHEN POLIS			1.05	0.48	0.912011			1.31	0.62	0.663
HYDROCODONE/IBUPROFEN	0.2	0.23	0.75	0.23	0.218776	0.1394	0.1498	0.81	0.32	0.509
HYDROCORTISONE	2.34	2.21	0.91	0.07	0.169824	1.4067	1.4862	0.82	0.1	0.0441
HYDROMORPHONE	0.37	0.32	0.89	0.17	0.512861	0.2028	0.1688	0.93	0.27	0.771
HYDROXYCHLOROQUINE SULFATE	0.78	0.75	0.8	0.12	0.0537032	0.4689	0.5165	0.69	0.17	0.0323
HYDROXYUREA	0.14	0.13	0.92	0.27	0.758578			1.32	0.36	0.467
HYDROXYZINE	2.26	2.26	0.93	0.07	0.323594	1.6348	1.5775	0.96	0.09	0.647
HYOSCYAMINE SULFATE	0.7	0.53	1.07	0.13	0.57544	0.5703	0.4366	1.58	0.16	0.724
IBANDRONATE	2.22	1.63	1.15	0.07	0.0489779	1.5587	1.1765	1.95	0.1	0.355
IBUPROFEN	4.33	4.47	0.99	0.05	0.831764	2.9401	3.1487	0.95	0.07	0.426
IMATINIB MESYLATE			0.64	0.74	0.549541			0	76.19	0.904
IMIPRAMINE	0.38	0.3	1.09	0.17	0.616595	0.3422	0.2145	1.32	0.21	0.192
IMMUNE GLOB,GAM CAPRYLATE(I			9.7	0.47	1.2e-06
INDAPAMIDE	0.56	0.51	1.11	0.14	0.457088	0.4182	0.401	1.34	0.18	0.855
INDOMETHACIN	1.04	1.3	0.77	0.1	0.0114815	0.735	0.9239	0.76	0.14	0.0506
INFLUENZA TV-S 07-08 VACCINE								1.12	1.05	0.912
ISONIAZID			1	0.38	1			1.64	0.45	0.271
ISOSORB DINIT/HYDRALAZINE								0.86	1.04	0.885
ISOSORBIDE DINITRATE	0.42	0.64	0.69	0.16	0.0186209	0.3041	0.4455	0.72	0.21	0.121
ISOSORBIDE MONONITRATE	2.97	3.54	0.82	0.06	0.0011749	2.2304	2.5662	0.85	0.08	0.0387
ISRADIPINE	0.2	0.23	0.84	0.23	0.457088	0.2154	0.2107	0.95	0.26	0.85
ITRACONAZOLE	0.11	0.05	1.58	0.33	0.169824			0.94	0.54	0.905
IVERMECTIN								0	85.91	0.914
KETOCONAZOLE	2.05	1.67	1.06	0.07	0.42658	1.318	1.0242	1.99	0.11	0.373
KETOPROFEN	0.23	0.14	1.44	0.22	0.102329	0.2281	0.1091	1.82	0.26	0.0224
KETOROLAC TROMETHAMINE	1.78	1.81	0.92	0.08	0.263027	1.2039	1.0991	1.3	0.11	0.976
KETOTIFEN FUMARATE			0.61	0.42	0.234423			0.7	0.47	0.443
LABETALOL	0.52	0.7	0.77	0.14	0.0616595	0.3168	0.5153	0.63	0.21	0.0258
LACTIC ACID	0.13	0.1	1.36	0.29	0.281838			1.29	0.36	0.484
LACTULOSE	1.27	1.09	1.07	0.09	0.457088	0.6843	0.6638	0.94	0.15	0.684
LAMIVUDINE
LAMOTRIGINE	0.61	0.38	1.28	0.14	0.074131	0.4435	0.2564	1.35	0.19	0.107
LANSOPRAZOLE	4.42	4.15	0.97	0.05	0.47863	3.4977	3.485	0.99	0.07	0.147
LANTHANUM CARBONATE			0.29	1.01	0.213796
LATANOPROST	3.22	3.07	1.01	0.06	0.831764	2.205	2.1842	0.96	0.08	0.632
LEFLUNOMIDE	0.18	0.15	0.91	0.25	0.691831	0.1394	0.0888	1.14	0.33	0.686
LENALIDOMIDE			1.18	0.38	0.676083			0.78	0.75	0.736
LETROZOLE						0.2154	0.1993	0.93	0.26	0.786
LEUCOVORIN CALCIUM			1.1	0.38	0.794328
LEVALBUTEROL	0.51	0.53	0.89	0.15	0.446684	0.2281	0.3579	0.58	0.25	0.0282
LEVETIRACETAM	0.77	0.62	1.04	0.12	0.758578	0.3675	0.3274	0.93	0.2	0.707
LEVOBUNOLOL	0.13	0.15	0.9	0.28	0.691831			0.96	0.35	0.779
LEVOCETIRIZINE DIHYDROCHLORID								1.22	0.36	0.578
LEVOFLOXACIN	8.32	7.12	0.96	0.04	0.323594	5.0184	4.5308	0.88	0.06	0.0264
LEVOTHYROXINE	16.31	15.62	0.96	0.03	0.112202	12.6473	12.2014	0.92	0.04	0.0305
LIDOCAINE	2.96	2.35	1.09	0.06	0.190546	1.6221	1.4976	0.93	0.1	0.463
LIDOCAINE/PRILOCAINE			0.6	0.33	0.114815			0.66	0.52	0.424
LINEZOLID			1.03	0.44	0.954993			1.13	0.62	0.843
LIOTHYRONINE	0.23	0.16	1.15	0.22	0.512861	0.1647	0.1015	1.24	0.3	0.482
LIPASE/PROTEASE/AMYLASE	0.16	0.23	0.61	0.25	0.0537032			0.35	0.51	0.0411
LISINOPRIL	18.74	20.62	0.89	0.03	1.94984e-05	13.5978	15.0519	0.86	0.04	4.87e-05
LISINOPRIL/HYDROCHLOROTHIAZID						3.485	3.9445	0.88	0.07	0.0587
LITHIUM CARBONATE	0.24	0.2	0.97	0.21	0.870964	0.1647	0.151	0.88	0.29	0.659
LOPERAMIDE	0.33	0.35	0.87	0.18	0.42658	0.2154	0.1904	1.9	0.26	0.973
LOPINAVIR/RITONAVIR								1.5	0.78	0.604
LORATADINE	0.51	0.51	1.09	0.15	0.562341	0.3548	0.3452	1.96	0.2	0.647
LORAZEPAM	1.05	0.98	0.94	0.1	0.524807	0.5576	0.5267	0.92	0.16	0.603
LOSARTAN POTASSIUM	4.71	4.82	0.99	0.05	0.812831	2.5092	2.735	0.92	0.08	0.265
LOSARTAN/HYDROCHLOROTHIAZID	2.07	2.5	0.83	0.07	0.01	1.2546	1.7006	0.72	0.11	0.00208
LOTEPREDNOL ETABONATE	0.73	0.7	0.9	0.12	0.363078	0.5196	0.4239	1.64	0.17	0.709
LOVASTATIN	4.57	5.45	0.87	0.05	0.00537032	3.8778	4.5511	0.86	0.06	0.0133
LUBIPROSTONE	0.35	0.24	1.23	0.18	0.251189	0.1901	0.1345	1.14	0.28	0.635
MEBENDAZOLE			2.43	0.47	0.060256			1.73	0.79	0.486
MECLIZINE	3.45	3.22	1	0.06	1	2.205	2.1791	0.93	0.08	0.395
MEDROXYPROGESTERONE ACET	0.24	0.19	1.05	0.21	0.831764
MEFLOQUINE			0.43	0.73	0.251189			0.42	1.02	0.391
MEGESTROL ACETATE	0.77	0.74	0.98	0.12	0.870964	0.3802	0.3515	1.45	0.2	0.823
MELOXICAM	5.73	5.26	0.97	0.05	0.457088	3.1808	3.2591	0.84	0.07	0.00866
MEMANTINE	2.23	2.14	0.93	0.07	0.301995	0.9631	1.2209	0.7	0.12	0.00274
MEPERIDINE			0.75	0.37	0.436516			0.62	0.52	0.355
MEPROBAMATE	0.12	0.05	2.32	0.32	0.00776247
MERCAPTOPURINE			0.82	0.53	0.707946
MESALAMINE	0.57	0.51	0.9	0.14	0.436516	0.4182	0.3972	0.84	0.18	0.34
METAPROTERENOL SULFATE								0	82.65	0.911
METAXALONE	0.78	0.53	1.26	0.12	0.0524807	0.5576	0.3858	1.2	0.16	0.27
METFORMIN	10.35	13.32	0.85	0.04	2.04174e-05	7.8571	10.2064	0.83	0.05	0.000101
METH/ME BLUE/BA/PHENY/ATP/HYO								1.26	0.41	0.572
METHADONE	0.39	0.28	1.14	0.17	0.436516	0.2408	0.2069	0.96	0.24	0.856
METHAZOLAMIDE			1.03	0.38	0.933254			0.76	0.61	0.648
METHENAMINE HIPPURATE			1.04	0.34	0.912011			0.63	0.6	0.445
METHIMAZOLE	0.3	0.25	1.09	0.19	0.645654	0.2028	0.1726	1.92	0.27	0.742
METHOCARBAMOL	1.29	0.91	1.21	0.09	0.040738	0.7857	0.5736	1.17	0.14	0.251
METHOTREXATE	1.19	1.11	0.83	0.1	0.0537032	0.8617	0.8351	0.79	0.13	0.0652
METHSCOPOLAMINE BROMIDE								0	83.26	0.91
METHYLDOPA			0.96	0.35	0.891251			0.85	0.43	0.71
METHYLDOPA/HYDROCHLOROTHIAZID								0.85	1.05	0.878
METHYLPHENIDATE	0.3	0.2	1.1	0.19	0.616595	0.1647	0.1447	0.89	0.3	0.68
METHYLPREDNISOLONE	4.25	4.02	0.84	0.05	0.00104713	2.1037	2.3822	0.69	0.08	5.95e-06
METOCLOPRAMIDE	2.15	2.07	0.94	0.07	0.354813	1.47	1.4341	0.93	0.1	0.475
METOLAZONE	0.59	0.73	0.83	0.13	0.162181	0.3168	0.4417	0.75	0.21	0.171
METOPROLOL	19.24	20.46	0.86	0.03	7.94e-08	14.6496	15.6725	0.84	0.04	3.08e-07
METOPROLOL/HYDROCHLOROTHIAZID								0.59	0.73	0.469
METRONIDAZOLE	3.01	2.51	0.97	0.06	0.60256	1.9136	1.5407	0.97	0.09	0.687
MIDODRINE	0.18	0.13	1.18	0.25	0.512861			1.95	0.4	0.822
MIGLITOL			0.63	0.73	0.524807
MILNACIPRAN								1.5	0.77	0.602
MINOCYCLINE	0.4	0.33	0.96	0.17	0.776247	0.2661	0.2056	1.1	0.23	0.967
MINOXIDIL			0.48	0.34	0.0331131			0.61	0.42	0.246
MIRTAZAPINE	1.86	1.72	0.9	0.08	0.18197	1.0772	1.047	0.87	0.12	0.213
MISOPROSTOL	0.11	0.15	0.62	0.3	0.114815			0.99	0.35	0.788
MODAFINIL	0.31	0.19	1.19	0.19	0.371535	0.2408	0.1447	1.24	0.25	0.39
MOEXIPRIL	0.13	0.11	1.23	0.29	0.47863			0.94	0.37	0.877
MOEXIPRIL/HYDROCHLOROTHIAZIDE								0.88	0.4	0.756
MOMETASONE FUROATE	3.86	3.54	0.94	0.05	0.281838	2.6486	2.5332	0.9	0.07	0.155
MONTELUKAST	3.68	3.43	0.97	0.06	0.60256	2.2938	2.5649	0.8	0.08	0.00416
MORPHINE SULFATE	0.68	0.61	0.89	0.13	0.380189	0.2535	0.3795	0.55	0.23	0.00961
MOXIFLOXACIN	4.07	4.05	0.88	0.05	0.0158489	2.1797	2.3999	0.78	0.08	0.00183
MTH/ME BLUE/SALICY/NA PHOS/HY								0.93	0.4	0.846
MUPIROCIN	2.21	1.85	0.98	0.07	0.794328	1.1659	0.9392	0.99	0.11	0.961
MYCOPHENOLATE MOFETIL	0.17	0.08	1.76	0.26	0.0316228			1.13	0.44	0.786
NA PHOS,M-B/NA PHOS,DI-BA			1.8	0.4	0.138038			1.56	0.64	0.488
NA SULFACETM/PREDNIS SP	0.16	0.13	1.09	0.26	0.74131			1.23	0.34	0.947
NABUMETONE	1.63	1.73	0.89	0.08	0.134896	1.1532	1.3237	0.82	0.11	0.0786
NADOLOL	0.43	0.42	0.93	0.16	0.630957	0.3675	0.3401	0.98	0.2	0.918
NAFTIFINE	0.26	0.25	0.9	0.2	0.60256	0.1774	0.1548	1.59	0.29	0.842
NAPHAZOLINE			0.39	0.46	0.0416869			0.47	0.59	0.201
NAPROXEN	4.56	4.4	1.03	0.05	0.588844	3.3202	3.2376	1	0.07	0.989
NATEGLINIDE	0.23	0.37	0.67	0.21	0.0630957	0.1394	0.2919	0.54	0.31	0.0444
NEBIVOLOL	0.78	0.71	1	0.12	0.977237	0.2535	0.2805	0.77	0.24	0.264
NEFAZODONE			0.23	1.01	0.147911			0	68.74	0.892
NEO/POLYMYX B SULF/DEXAMETH	0.5	0.56	0.79	0.15	0.1	0.2408	0.3084	0.7	0.24	0.131
NEOMY SULF/POLYMYX B SULF/HC						0.3675	0.5254	0.63	0.19	0.0152
NEPAFENAC	1.08	0.92	1.02	0.1	0.831764	0.5323	0.4899	0.93	0.16	0.66
NIACIN	1.97	1.78	1	0.08	0.954993	1.2546	1.2653	0.86	0.11	0.155
NIACIN/LOVASTATIN	0.14	0.18	0.77	0.27	0.323594	0.1394	0.1777	0.74	0.31	0.344
NIACIN/SIMVASTATIN			0.84	0.35	0.616595			0.99	0.47	0.99
NICARDIPINE								1.56	0.76	0.558
NICOTINE			1.55	0.37	0.234423			1.79	0.46	0.204
NIFEDIPINE	2.27	2.7	0.9	0.07	0.11749	2.091	2.2045	1	0.08	0.976
NISOLDIPINE	0.32	0.44	0.73	0.18	0.0851138	0.3168	0.3934	0.84	0.21	0.298
NITROFURANTOIN	3.45	3.2	0.88	0.06	0.0223872	2.129	1.9304	0.9	0.08	0.198
NITROGLYCERIN	4.53	4.97	0.82	0.05	0.000107152	2.8387	3.3264	0.76	0.07	0.00012
NIZATIDINE	0.12	0.14	0.89	0.29	0.676083			0.67	0.39	0.315
NORETHIND AC/ETHINYL ESTRADIO								1.75	0.37	0.135
NORTRIPTYLINE	0.93	0.64	1.24	0.11	0.0524807	0.5956	0.4632	1.89	0.16	0.589
NYSTATIN	2.57	2.16	1.03	0.07	0.691831	1.47	1.1993	1.37	0.1	0.721
NYSTATIN/TRIAMCIN	1.12	1.13	0.84	0.1	0.0691831	0.697	0.7158	0.81	0.14	0.148
OFLOXACIN	0.39	0.55	0.66	0.16	0.01	0.1521	0.2272	0.61	0.3	0.103
OLANZAPINE	0.66	0.75	0.72	0.13	0.0112202	0.4816	0.5038	0.82	0.17	0.235
OLANZAPINE/FLUOXETINE			1.48	0.49	0.42658			0.58	1.04	0.602
OLMESARTAN MEDOXOMIL	2.27	2.07	1.03	0.07	0.660693	1.7235	1.5699	1.5	0.09	0.954
OLMESARTAN/HYDROCHLOROTHIAZID						1.1405	1.1384	0.96	0.11	0.724
OLOPATADINE	1.56	1.62	0.89	0.08	0.154882	1.0265	1.1232	0.85	0.12	0.176
Omega-3						0.4942	0.7006	0.62	0.17	0.004
OMEPRAZOLE	14.69	14.63	0.91	0.03	0.00151356	8.7315	9.2697	0.83	0.04	2.54e-05
ONDANSETRON	0.43	0.42	0.79	0.16	0.128825			0.56	0.37	0.113
ORPHENADRINE CITRATE	0.24	0.23	1.1	0.21	0.676083	0.1774	0.1612	1.2	0.29	0.527
ORPHENADRINE/ASPIRIN/CAFFEINE								0.55	1.03	0.563
OSELTAMIVIR PHOSPHATE	0.2	0.19	0.91	0.23	0.691831			0.87	0.4	0.716
OXAPROZIN	0.32	0.28	0.96	0.19	0.831764	0.2028	0.2081	0.88	0.26	0.419
OXAZEPAM			0.97	0.53	0.954993			1.24	0.77	0.808
OXCARBAZEPINE	0.34	0.17	1.64	0.19	0.0074131	0.2408	0.1269	1.59	0.25	0.0677
OXICONAZOLE NITRATE	0.11	0.08	1.17	0.33	0.630957			1.63	0.42	0.26
OXYBUTYNIN	3.13	2.36	1.18	0.06	0.0057544	1.7108	1.5204	0.99	0.09	0.949
OXYCODONE	1.56	1.48	0.85	0.08	0.0512861	0.9504	0.8402	0.92	0.12	0.518
OXYCODONE /ACETAMINOPHEN	6.31	5.32	0.99	0.04	0.74131	4.0299	3.32	1.12	0.06	0.848
OXYCODONE /ASPIRIN			1.72	0.55	0.323594			2.36	0.65	0.201
OXYMORPHONE			0.8	0.47	0.630957
P-EPHED /BROMPHENIRAMIN			0.99	0.48	0.977237			0.5	0.73	0.338
P-EPHED /CETIRIZINE	0.12	0.11	0.92	0.29	0.776247			0.96	0.34	0.892
P-EPHED /FEXOFENADINE						0.2915	0.2665	0.95	0.22	0.826
P-EPHED SUL/DESLORATADINE								0.57	1.04	0.512
P-EPHED SUL/LORATADINE								0	77.21	0.904
PANTOPRAZOLE	5.58	5.28	0.94	0.05	0.147911	3.6117	3.6424	0.87	0.06	0.0341
PAPAIN/UREA			0.72	0.6	0.588844
PAPAIN/UREA/CHLOROPHYLLIN			1.42	0.54	0.512861			1.24	0.76	0.774
PAPAVERINE			0.58	0.73	0.457088
PAREGORIC								0	78.41	0.906
PARICALCITOL			0.93	0.37	0.851138			1.42	0.61	0.946
PAROXETINE	2.84	2.53	1.02	0.06	0.812831	1.8249	1.9938	0.82	0.09	0.025
PEG 3350/NA SULF,BICARB,CL/KC						0.3041	0.2881	0.96	0.22	0.863
PENCICLOVIR	0.11	0.09	0.94	0.31	0.831764			1.36	0.39	0.432
PENICILLIN G BENZATHINE	1.37	1.37	0.89	0.09	0.190546	0.8744	0.8668	0.89	0.13	0.364
PENTAZOCINE /NALOXONE HC			2.15	0.42	0.0707946
PENTOSAN POLYSULFATE			0.74	0.35	0.398107			0.84	0.44	0.692
PENTOXIFYLLINE	0.47	0.56	0.87	0.15	0.346737	0.2788	0.4391	0.67	0.22	0.071
PERINDOPRIL ERBUMINE			0.77	0.37	0.47863			0.43	0.59	0.154
PERMETHRIN	0.23	0.3	0.69	0.21	0.0870964			0.7	0.33	0.272
PERPHENAZINE			0.88	0.4	0.74131
PERPHENAZINE/AMITRIPTYLINE HC								0.86	0.4	0.712
PHENAZOPYRIDINE	0.89	0.85	0.87	0.11	0.199526	0.6463	0.6511	0.81	0.15	0.16
PHENOBARBITAL			1.32	0.41	0.501187
PHENYLEPHRINE/BROMPHENIRAMIN								1.23	0.41	0.62
PHENYLEPHRINE/P-TLOX CI/CP			0.46	1.03	0.446684			0	90.8	0.918
PHENYTOIN	0.84	0.83	0.92	0.11	0.457088	0.6843	0.6523	0.93	0.15	0.631
PILOCARPINE	0.24	0.22	0.97	0.21	0.870964	0.1901	0.1561	1.15	0.28	0.612
PIMECROLIMUS	0.16	0.11	1.22	0.26	0.457088			0.84	0.37	0.641
PINDOLOL			1.27	0.34	0.47863			0.52	0.6	0.274
PIOGLITAZONE	3.03	4.14	0.83	0.06	0.00323594	2.4458	3.3404	0.82	0.08	0.0123
PIPERACILLIN /TAZOBACTA								0.58	1.04	0.594
PIRBUTEROL ACETATE			1.63	0.39	0.20893			2.2	0.43	0.0644
PIROXICAM	0.71	0.6	1.08	0.12	0.537032	0.5956	0.4988	1.79	0.16	0.628
POLYETHYLENE GLYCOL 3350	2.9	2.36	1.05	0.06	0.457088	1.7868	1.4862	1.17	0.09	0.856
POLYMYXIN B SULF/TRIMETHOPRIM								0.81	0.61	0.733
POTASSIUM CHLORIDE	9.98	11.03	0.82	0.04	5.62e-08	6.9193	7.9194	0.8	0.05	2.12e-06
POTASSIUM CITRATE	0.2	0.21	0.8	0.23	0.338844	0.1647	0.1485	0.9	0.29	0.71
PRAMIPEXOLE DI-	1.07	0.75	1.2	0.1	0.0831764	0.621	0.4912	1.31	0.15	0.842
PRAMLINTIDE ACETATE			1.43	0.48	0.457088
PRASUGREL	0.11	0.13	0.81	0.32	0.512861
PRAVASTATIN	6.34	6.45	0.94	0.04	0.147911	4.0046	3.9673	0.92	0.06	0.175
PRAZOSIN			0.67	0.35	0.251189			0.55	0.52	0.248
PREDNICARBATE			1.63	0.49	0.323594			1.12	0.76	0.877
PREDNISOLONE	2.46	2.6	0.89	0.07	0.0776247	1.0645	1.2806	0.78	0.12	0.0297
PREDNISONE	9.93	8.55	0.98	0.04	0.630957	5.7787	5.159	0.93	0.05	0.148
PREGABALIN	2.68	2.19	1.05	0.07	0.436516	1.7742	1.5395	0.99	0.09	0.913
PRENATAL VIT/FE FUMARATE/FA			1.23	0.41	0.60256
PRIMIDONE	0.66	0.49	1.1	0.13	0.446684	0.4435	0.3338	1.64	0.18	0.732
PROBENECID	0.11	0.12	0.93	0.3	0.812831			1.56	0.4	0.891
PROCHLORPERAZINE EDISYLATE	0.61	0.58	0.85	0.13	0.20893	0.3548	0.3338	0.87	0.2	0.492
PROGESTERONE								0.72	0.4	0.374
PROMETHAZINE	2.3	2.31	0.83	0.07	0.00724436	1.508	1.49	0.86	0.1	0.12
PROPAFENONE	0.32	0.36	0.69	0.18	0.0446684	0.2535	0.264	0.74	0.24	0.195
PROPOXYPHENE	0.11	0.13	0.69	0.32	0.245471			0.73	0.4	0.427
PROPOXYPHENE /ACETAMINOP	6.23	6.3	0.85	0.04	0.00025704	4.5241	4.8697	0.79	0.06	6.66e-05
PROPOXYPHENE NAPSYL								2.75	0.68	0.135
PROPRANOLOL	1.62	1.36	1.04	0.08	0.660693	1.318	1.0838	1.45	0.11	0.68
PROPYLTHIOURACIL			0.72	0.43	0.446684			1.27	0.44	0.666
PSEUDOEPHEDRINE /CHLOR-MAL								1.68	0.39	0.184
PYRIDOSTIGMINE BROMIDE	0.53	0.1	4.45	0.17	1.29e-18	0.1647	0.0673	2.12	0.31	0.017
QUETIAPINE FUMARATE	1.4	1.54	0.77	0.09	0.00275423	0.7857	0.9227	0.74	0.13	0.0262
QUINAPRIL	1.48	1.53	0.97	0.09	0.707946	1.3306	1.3224	0.97	0.1	0.775
QUINAPRIL/HYDROCHLOROTHIAZIDE								0.75	0.37	0.43
QUINIDINE GLUCONATE			1.22	0.48	0.676083
QUININE SULFATE	0.95	0.86	1.02	0.11	0.831764	0.7223	0.8008	0.84	0.14	0.221
RABEPRAZOLE	1.52	1.03	1.27	0.09	0.00537032	1.3053	0.8782	1.29	0.11	0.0176
RAMELTEON	0.2	0.16	0.98	0.23	0.954993			0.68	0.37	0.292
RAMIPRIL	2.96	2.97	0.93	0.06	0.234423	2.2811	2.3733	0.87	0.08	0.0833
RANITIDINE	3.82	4.54	0.83	0.05	0.000660693	2.5219	3.2452	0.77	0.08	0.000629
RANOLAZINE	0.32	0.29	1.02	0.19	0.912011	0.1394	0.1117	1.16	0.32	0.653
RASAGILINE MESYLATE	0.19	0.1	1.54	0.25	0.0812831			1.28	0.45	0.588
REPAGLINIDE	0.32	0.4	0.87	0.18	0.436516	0.2408	0.2754	0.93	0.24	0.772
RETAPAMULIN			1.54	0.49	0.389045			1.11	0.77	0.891
RIFAMPIN	0.11	0.1	0.81	0.32	0.501187			0.71	0.47	0.474
RIFAXIMIN			0.7	0.4	0.363078
RISPERIDONE	1.11	1.07	0.9	0.1	0.288403	0.6463	0.6511	0.85	0.15	0.276
RIVASTIGMINE	0.73	0.74	0.84	0.12	0.144544	0.2661	0.4023	0.56	0.23	0.0105
RIZATRIPTAN BENZOATE			0.86	0.38	0.676083			0.97	0.48	0.946
ROPINIROLE	1.74	1.17	1.26	0.08	0.00446684	1.1659	0.7754	1.26	0.11	0.0425
ROSIGLITAZONE	1.68	2.25	0.86	0.08	0.0691831	1.508	2.1766	0.8	0.1	0.0222
ROSIGLITAZONE/GLIMEPIRIDE			0.37	0.45	0.0295121			0.31	0.59	0.0483
ROSIGLITAZONE/METFORMIN	0.16	0.37	0.51	0.25	0.0074131			0.49	0.32	0.0258
ROSUVASTATIN CALCIUM	6.26	6.36	0.92	0.04	0.057544	4.0806	4.5092	0.83	0.06	0.00153
ROTIGOTINE			1.99	0.47	0.144544			2.13	0.67	0.261
SALICYLIC ACID			1.87	0.38	0.0977237
SALMETEROL XINAFOATE	0.21	0.21	0.88	0.23	0.562341	0.1901	0.1675	0.97	0.28	0.917
SALSALATE	0.11	0.17	0.59	0.31	0.0912011			0.76	0.35	0.435
SAXAGLIPTIN			0.54	0.33	0.060256			0.91	0.61	0.877
SCOPOLAMINE	0.28	0.17	1.28	0.2	0.218776			1.26	0.34	0.505
SELEGILINE	0.12	0.09	1.04	0.3	0.891251			0.81	0.43	0.633
SERTACONAZOLE NITRATE			0.83	0.47	0.707946
SERTRALINE	5.48	4.3	1.14	0.05	0.0047863	3.2315	2.985	0.94	0.07	0.358
SEVELAMER CARBONATE	0.12	0.26	0.6	0.29	0.0758578			0.45	0.51	0.115
SILDENAFIL CITRATE	1.12	1.02	1	0.1	0.977237
SILODOSIN								0.99	0.76	0.984
SILVER SULFADIAZINE	0.54	0.61	0.77	0.14	0.0691831	0.2661	0.3376	0.7	0.23	0.118
SIMVASTATIN	21.88	23.31	0.89	0.03	1.62181e-05	15.5874	16.3096	0.88	0.03	0.000194
SITAGLIPTIN PHOS/METFORMIN HC						0.1774	0.2272	0.82	0.28	0.476
SITAGLIPTIN PHOSPHATE	1.24	1.68	0.81	0.09	0.0281838	0.7477	0.9392	0.84	0.14	0.213
SOD CHLORIDE/NAHCO3/KCL/PEG'S						0.7604	0.5698	1.56	0.14	0.694
POLYSTYRENE SULFONATE								0.3	0.72	0.0917
SOLIFENACIN	1.73	1.19	1.24	0.08	0.00758578	1.0011	0.7145	1.19	0.12	0.165
SOTALOL	0.86	0.83	0.84	0.11	0.112202	0.659	0.6219	0.84	0.15	0.239
SPIRONOLACT/HYDROCHLOROTHIAZI						0.2535	0.231	1.25	0.24	0.919
SPIRONOLACTONE	2.33	2.63	0.83	0.07	0.00676083	1.5334	1.6448	0.88	0.1	0.193
SUCRALFATE	1.3	1.09	1	0.09	0.977237	0.7477	0.6701	0.93	0.14	0.613
SULFACET SOD/SULFUR/WITCH HAZ								0.63	0.37	0.207
SULFAMETHOXAZOLE/TRIMETHOPRIM						3.6877	3.4457	0.97	0.06	0.129
SULFASALAZINE	0.26	0.26	0.83	0.2	0.371535	0.1647	0.1954	0.71	0.29	0.24
SULINDAC	0.38	0.49	0.77	0.17	0.107152	0.3168	0.3782	0.78	0.21	0.247
SUMATRIPTAN	0.39	0.3	1.04	0.17	0.812831	0.2915	0.217	1.58	0.22	0.802
TACROLIMUS	0.13	0.09	1.24	0.29	0.457088			1.55	0.39	0.259
TAMOXIFEN CITRATE	0.32	0.39	0.66	0.18	0.0213796
TAMSULOSIN	8.54	7.26	1.06	0.04	0.138038	5.8548	5.1057	0.99	0.05	0.858
TAZAROTENE			2.32	0.41	0.0398107			2.75	0.53	0.0567
TEGASEROD HYDROGEN	0.33	0.25	1.16	0.18	0.40738	0.3295	0.2323	1.23	0.21	0.322
TELITHROMYCIN			0.78	0.48	0.60256			0.86	0.54	0.784
TELMISARTAN	0.93	0.76	1.2	0.11	0.0912011	0.7477	0.6066	1.2	0.14	0.195
TELMISARTAN/HYDROCHLOROTHIAZI						0.3422	0.4137	0.79	0.2	0.249
TEMAZEPAM	0.39	0.45	0.81	0.16	0.190546	0.2535	0.2449	1.9	0.24	0.969
TERAZOSIN	2.11	2.09	0.95	0.07	0.457088	1.7742	1.6448	0.99	0.09	0.892
TERBINAFINE	0.68	0.71	0.85	0.13	0.190546	0.4562	0.4632	0.85	0.18	0.349
TERBUTALINE SULFATE			2.19	0.42	0.0630957
TERIPARATIDE	0.42	0.27	1.23	0.16	0.204174	0.2535	0.1993	1.8	0.24	0.973
TESTOSTERONE	1.16	0.7	1.33	0.1	0.00501187	0.7097	0.4518	1.23	0.15	0.207
TETRACYCLINE	0.36	0.42	0.7	0.17	0.0389045	0.2535	0.3186	0.64	0.23	0.0557
THALIDOMIDE			0.25	1.02	0.169824			0.47	1.04	0.465
THEOPHYLLINE ANHYDROUS	0.56	0.63	0.88	0.14	0.338844	0.3422	0.5051	0.66	0.2	0.0393
THIORIDAZINE			0.7	0.52	0.489779			0.34	1.02	0.286
THIOTHIXENE			0.19	1.01	0.102329			0	87.29	0.907
THYROID	0.54	0.46	0.97	0.14	0.831764	0.4055	0.3744	0.89	0.19	0.546
TIAGABINE								0.65	1.05	0.684
TICAGRELOR			4.92	0.6	0.00831764
TICLOPIDINE			1.08	0.38	0.851138			1.34	0.49	0.552
TIMOLOL	2.12	2.07	0.97	0.07	0.691831	1.6601	1.5242	1.11	0.09	0.911
TIMOLOL /DORZOLAM						0.8111	0.9163	0.85	0.13	0.206
TIOTROPIUM BROMIDE	3.36	3.19	0.99	0.06	0.891251	1.9136	1.9798	0.87	0.09	0.11
TIZANIDINE	1.08	0.59	1.5	0.1	9.12011e-05	0.5069	0.349	1.18	0.17	0.339
TOBRAMYCIN	0.25	0.27	0.76	0.21	0.18197	0.1774	0.1333	1.9	0.29	0.764
TOBRAMYCIN SULF/DEXAMETHASONE						0.8744	0.6257	1.18	0.13	0.205
TOBRAMYCIN/LOTEPRED ETAB			0.29	0.51	0.0144544			0.78	0.52	0.639
TOLTERODINE TARTRATE	3.07	2.33	1.17	0.06	0.0125893	2.3064	1.8085	1.12	0.08	0.159
TOPIRAMATE	0.47	0.42	0.89	0.15	0.436516	0.3168	0.283	0.87	0.21	0.516
TORSEMIDE	0.48	0.75	0.61	0.15	0.000776247	0.3041	0.5254	0.55	0.21	0.0044
TRAMADOL	7.16	6.87	0.93	0.04	0.0891251	4.0299	4.0092	0.94	0.06	0.102
TRAMADOL /ACETAMINOPHEN	1.06	1.48	0.68	0.1	8.12831e-05	0.7984	1.0508	0.72	0.13	0.0121
TRANDOLAPRIL	0.2	0.19	0.95	0.23	0.831764	0.2028	0.1599	1.18	0.27	0.702
TRANDOLAPRIL/VERAPAMIL	0.12	0.18	0.71	0.29	0.229087			0.69	0.37	0.176
TRAVOPROST	1.68	1.92	0.84	0.08	0.0263027	1.1279	1.3846	0.77	0.11	0.0199
TRAZODONE	3.01	2.68	0.96	0.06	0.537032	1.9516	1.7616	0.95	0.09	0.558
TRETINOIN	0.25	0.21	0.9	0.21	0.616595	0.1774	0.1485	0.87	0.28	0.634
TRIAMCINOLONE	5.16	5.15	0.87	0.05	0.00251189	3.0921	3.4393	0.77	0.07	0.000122
TRIAMTERENE/HYDROCHLOROTHIAZI						4.7776	4.4483	1.25	0.06	0.658
TRIAZOLAM			1.42	0.44	0.436516
TRIFLUOPERAZINE			0.73	0.6	0.60256
TRIFLURIDINE			0.96	0.38	0.912011			0.43	0.73	0.249
TRIHEXYPHENIDYL	0.12	0.09	1.12	0.3	0.707946			1.26	0.41	0.573
TRIMETHOBENZAMIDE			0.56	0.52	0.269153
TRIMETHOPRIM	0.21	0.16	0.98	0.23	0.912011	0.1521	0.1168	1	0.31	0.986
TROSPIUM CHLORIDE	0.3	0.24	0.98	0.19	0.891251	0.2408	0.1498	1.26	0.25	0.349
TRYPSIN/BALSAM PERU/CASTOR OI								0.27	1.02	0.201
UREA	0.28	0.34	0.73	0.2	0.104713	0.1774	0.2792	0.58	0.28	0.0509
URSODIOL	0.19	0.17	0.95	0.24	0.831764			0.91	0.34	0.782
VALACYCLOVIR	1.22	0.84	1.13	0.1	0.204174	0.7857	0.5343	1.12	0.14	0.425
VALPROATE	0.13	0.12	0.92	0.29	0.758578			0.73	0.47	0.505
VALSARTAN	5.51	5.5	0.97	0.05	0.537032	4.3214	4.2998	0.96	0.06	0.511
VALSARTAN/HYDROCHLOROTHIAZI	3.11	3.73	0.83	0.06	0.00199526	2.712	3.0066	0.88	0.07	0.089
VANCOMYCIN	0.28	0.3	0.79	0.2	0.229087	0.1521	0.1574	0.82	0.3	0.521
VARDENAFIL	0.19	0.24	0.73	0.23	0.17378	0.2028	0.2221	0.85	0.26	0.411
VARENICLINE TARTRATE	0.65	0.59	1	0.13	0.977237	0.5449	0.4455	1.88	0.16	0.609
VARICELLA VACC/PF			0.66	0.6	0.489779
VENLAFAXINE	1.92	1.71	0.95	0.08	0.512861	1.1786	1.2311	0.84	0.11	0.0476
VERAPAMIL	2.22	2.45	0.87	0.07	0.0489779	1.7742	2.0598	0.82	0.09	0.0312
WARFARIN	8.93	9.2	0.78	0.04	4.9e-11	6.4504	6.5411	0.79	0.05	1.51e-06
ZAFIRLUKAST	0.13	0.13	0.94	0.28	0.812831			0.66	0.43	0.333
ZALEPLON	0.19	0.18	0.84	0.24	0.446684			0.73	0.33	0.344
ZIPRASIDONE			0.42	0.36	0.0158489			0.38	0.51	0.0613
ZOLPIDEM TARTRATE	8.12	6.99	0.99	0.04	0.794328	5.4619	4.8481	0.94	0.05	0.243
ZONISAMIDE			0.8	0.38	0.549541			0.54	0.6	0.308
